# Supplementary material for: Interdependent Phosphorylation within the Kinase Domain T-loop Regulates CHK2 Activity
Source: PubMed Central journal article supplement — J Biol Chem. 2010 Aug 16;285(43):33348–57. doi: 10.1074/jbc.M110.149609 (PMC2963420; doi:10.1074/jbc.m110.149609), 2010-08-16
Supplement: supp_M110.149609_Supplemental_fig.pdf [file supp_M110.149609_Supplemental_fig.pdf]

# Supplimental Figure 1.

## A. ILGEPtSL\*MR

PR07-018 #1388 RT: 18.98 AV: 1 NL: 8.47E4  
T: ITMS + c NSI d Full ms2 558.46@cid35.00 [140.00-2000.00]

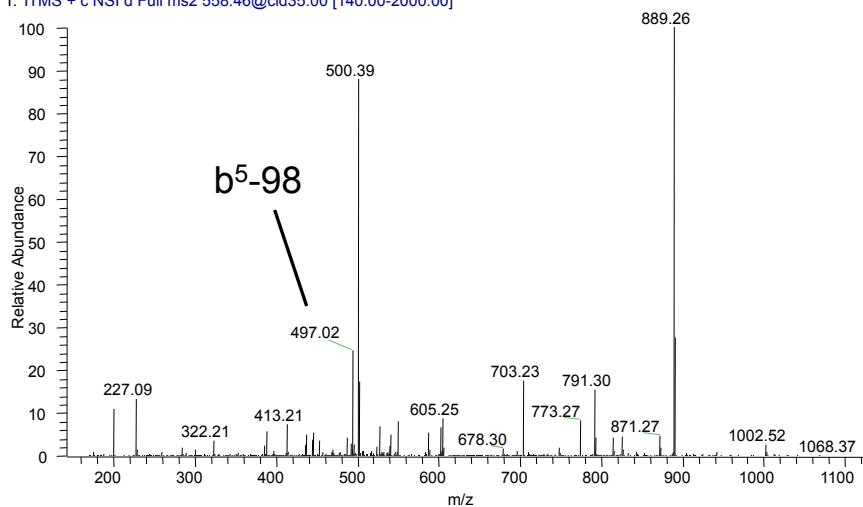

| # | b        | b <sup>++</sup> | b <sup>0</sup> | b <sup>0++</sup> | Seq. | y        | y <sup>++</sup> | y <sup>*</sup> | y <sup>*++</sup> | y <sup>0</sup> | y <sup>0++</sup> | # |
|---|----------|-----------------|----------------|------------------|------|----------|-----------------|----------------|------------------|----------------|------------------|---|
| 1 | 114.0913 | 57.5493         |                |                  | I    |          |                 |                |                  |                |                  | 9 |
| 2 | 227.1754 | 114.0913        |                |                  | L    | 904.4557 | 452.7315        | 887.4291       | 444.2182         | 886.4451       | 443.7262         | 8 |
| 3 | 284.1969 | 142.6021        |                |                  | G    | 791.3716 | 396.1894        | 774.3451       | 387.6762         | 773.3610       | 387.1842         | 7 |
| 4 | 413.2395 | 207.1234        | 395.2289       | 198.1181         | E    | 734.3501 | 367.6787        | 717.3236       | 359.1654         | 716.3396       | 358.6734         | 6 |
| 5 | 496.2766 | 248.6419        | 478.2660       | 239.6366         | T    | 605.3076 | 303.1574        | 588.2810       | 294.6441         | 587.2970       | 294.1521         | 5 |
| 6 | 583.3086 | 292.1579        | 565.2980       | 283.1527         | S    | 522.2704 | 261.6389        | 505.2439       | 253.1256         | 504.2599       | 252.6336         | 4 |
| 7 | 696.3927 | 348.7000        | 678.3821       | 339.6947         | L    | 435.2384 | 218.1228        | 418.2119       | 209.6096         |                |                  | 3 |
| 8 | 843.4281 | 422.2177        | 825.4175       | 413.2124         | M    | 322.1544 | 161.5808        | 305.1278       | 153.0675         |                |                  | 2 |
| 9 |          |                 |                |                  | R    | 175.1190 | 88.0631         | 158.0924       | 79.5498          |                |                  | 1 |

## B. ILGETpSL\*MR

Chk-2-238 2133 RT: 39.10 AV: 1 NL: 2.80E3  
T: ITMS + c NSI d Full ms2 558.40@cid28.00 [140.00-2000.00]

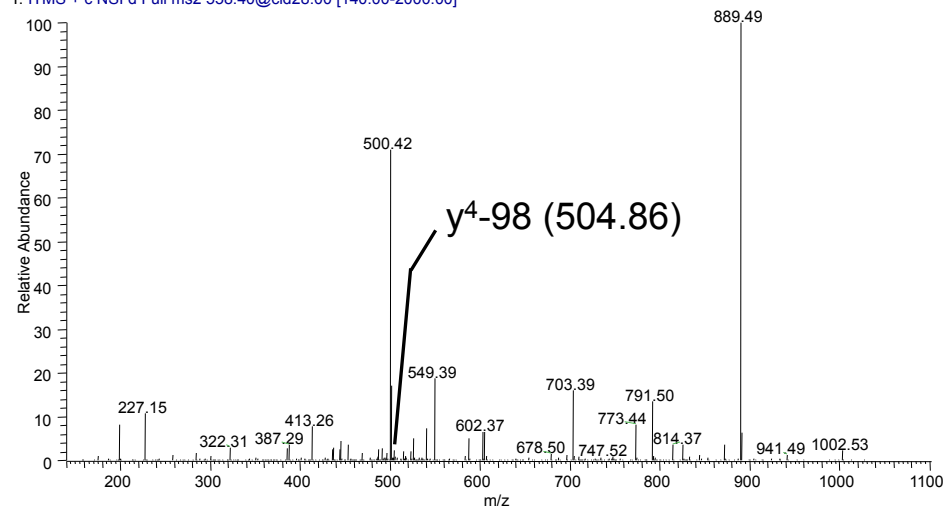

| # | b        | b <sup>++</sup> | b <sup>0</sup> | b <sup>0++</sup> | Seq. | y        | y <sup>++</sup> | y <sup>*</sup> | y <sup>*++</sup> | y <sup>0</sup> | y <sup>0++</sup> | # |
|---|----------|-----------------|----------------|------------------|------|----------|-----------------|----------------|------------------|----------------|------------------|---|
| 1 | 114.0913 | 57.5493         |                |                  | I    |          |                 |                |                  |                |                  | 9 |
| 2 | 227.1754 | 114.0913        |                |                  | L    | 904.4557 | 452.7315        | 887.4291       | 444.2182         | 886.4451       | 443.7262         | 8 |
| 3 | 284.1969 | 142.6021        |                |                  | G    | 791.3716 | 396.1894        | 774.3451       | 387.6762         | 773.3610       | 387.1842         | 7 |
| 4 | 413.2395 | 207.1234        | 395.2289       | 198.1181         | E    | 734.3501 | 367.6787        | 717.3236       | 359.1654         | 716.3396       | 358.6734         | 6 |
| 5 | 514.2871 | 257.6472        | 496.2766       | 248.6419         | T    | 605.3076 | 303.1574        | 588.2810       | 294.6441         | 587.2970       | 294.1521         | 5 |
| 6 | 583.3086 | 292.1579        | 565.2980       | 283.1527         | S    | 504.2599 | 252.6336        | 487.2333       | 244.1203         | 486.2493       | 243.6283         | 4 |
| 7 | 696.3927 | 348.7000        | 678.3821       | 339.6947         | L    | 435.2384 | 218.1228        | 418.2119       | 209.6096         |                |                  | 3 |
| 8 | 843.4281 | 422.2177        | 825.4175       | 413.2124         | M    | 322.1544 | 161.5808        | 305.1278       | 153.0675         |                |                  | 2 |
| 9 |          |                 |                |                  | R    | 175.1190 | 88.0631         | 158.0924       | 79.5498          |                |                  | 1 |

Supplemental Figure 2

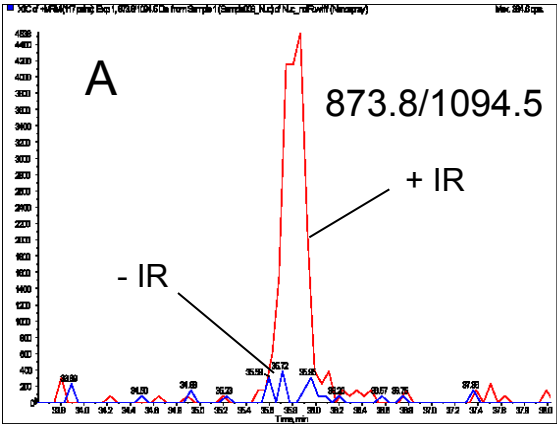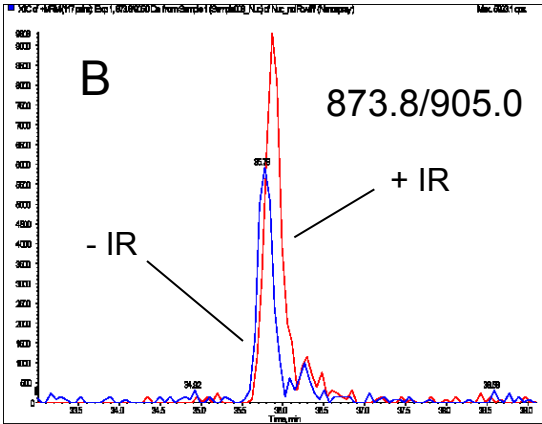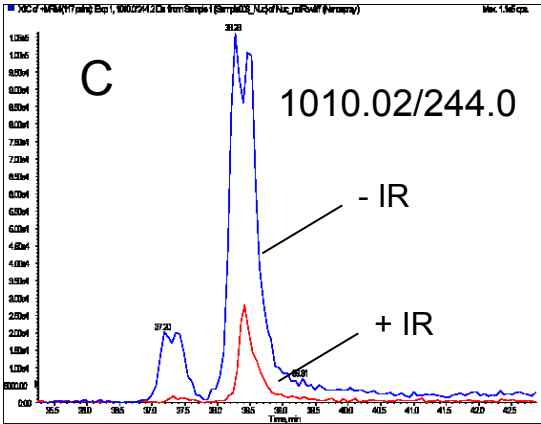

## Supplemental Table 1

| Peptide                                                                             | Q1a     | Q1b     | Q3a     | Q3b     |
|-------------------------------------------------------------------------------------|---------|---------|---------|---------|
| ITDFGHSK                                                                            | 452.7   |         | 575.3   | 234.1   |
| ITDFGH <b>p</b> SK                                                                  | 492.7   |         | 655.3   | 314.1   |
| ILGETSLMR                                                                           | 510.3   |         | 607.3   | 306.2   |
| ILGETSL*MR                                                                          | 518.3   |         | 623.3   | 322.1   |
| ILGE <b>p</b> TSLMR                                                                 | 550.3   |         | 506.27  | 254.13  |
| ILGET <b>p</b> SLMR                                                                 | 550.3   |         | 586.24  | 514.28  |
| ILGE <b>p</b> TSL*MR                                                                | 558.3   |         | 496.27  | 506.27  |
| ILGET <b>p</b> SL*MR                                                                | 558.3   |         | 586.24  | 504.25  |
| ILGE <b>p</b> T <b>p</b> SLMR                                                       | 590.2   |         | 767.3   | 306.2   |
| ILGE <b>p</b> T <b>p</b> SL*MR                                                      | 598.2   |         | 783.2   | 322.1   |
| TLCGTPTYLAPEVLVSVGTAGYNR                                                            | 847.1   | 1270.8  | 1461.8  | 289.2   |
| <b>p</b> TLCGTPTYLAPEVLVSVGTAGYNR                                                   | 873.76  | 1310.13 | 512.15  | 1055.05 |
| TLCG <b>p</b> TPTYLAPEVLVSVGTAGYNR                                                  | 873.76  | 1310.13 | 613.21  | 1094.54 |
| TLCGTP <b>p</b> TYLAPEVLVSVGTAGYNR                                                  | 873.76  | 1310.13 | 1044.01 | 630.29  |
| TLCGTPT <b>p</b> YLAPEVLVSVGTAGYNR                                                  | 873.76  | 1310.13 | 316.14  | 1044.51 |
| <b>p</b> TLCG <b>p</b> TPTYLAPEVLVSVGTAGYNR                                         | 900.41  | 1350.11 | 455.13  | 904.98  |
| <b>p</b> TLCGTP <b>p</b> TYLAPEVLVSVGTAGYNR                                         | 900.41  | 1350.11 | 891.27  | 1054.35 |
| <b>p</b> TLCGTPT <b>p</b> YLAPEVLVSVGTAGYNR                                         | 900.41  | 1350.11 | 811.3   | 1095.04 |
| TLCG <b>p</b> T <b>p</b> TYLAPEVLVSVGTAGYNR                                         | 900.41  | 1350.11 | 432.19  | 710.26  |
| TLCG <b>p</b> TPT <b>p</b> YLAPEVLVSVGTAGYNR                                        | 900.41  | 1350.11 | 1054.33 | 1134.52 |
| TLCGTP <b>p</b> T <b>p</b> YLAPEVLVSVGTAGYNR                                        | 900.41  | 1350.11 | 1083.99 | 630.3   |
| <b>p</b> TLCG <b>p</b> T <b>p</b> T <b>p</b> YLAPEVLVSVGTAGYNR                      | 927.07  | 1390.09 | 790.22  | 1134.3  |
| <b>p</b> TLCG <b>p</b> TPT <b>p</b> YLAPEVLVSVGTAGYNR                               | 927.07  | 1390.09 | 693.17  | 995.49  |
| <b>p</b> TLCGTP <b>p</b> T <b>p</b> YLAPEVLVSVGTAGYNR                               | 927.07  | 1390.09 | 891.27  | 944.96  |
| TLCG <b>p</b> T <b>p</b> T <b>p</b> YLAPEVLVSVGTAGYNR                               | 927.07  | 1390.09 | 710.26  | 1214.27 |
| <b>p</b> TLCG <b>p</b> T <b>p</b> T <b>p</b> YLAPEVLVSVGTAGYNR                      | 953.72  | 1430.08 | 790.22  | 731.88  |
| ILGE <b>p</b> T <b>p</b> SLMRTLTCGTPTYLAPEVLVSVGTAGYNR                              | 1233.92 | 1850.38 | 1470.25 | 874.34  |
| ILGET <b>p</b> SLMR <b>p</b> TLCG <b>p</b> TPTYLAPEVLVSVGTAGYNR                     | 1260.57 | 1890.36 | 681.29  | 887.34  |
| ILGE <b>p</b> T <b>p</b> SLMRTLTCGTPT <b>p</b> YLAPEVLVSVGTAGYNR                    | 1260.57 | 1890.36 | 594.25  | 1684.25 |
| ILGET <b>p</b> SLMR <b>p</b> TLCG <b>p</b> TPT <b>p</b> YLAPEVLVSVGTAGYNR           | 1287.23 | 1930.34 | 944.96  | 681.29  |
| ILGE <b>p</b> T <b>p</b> SLMR <b>p</b> TLCG <b>p</b> TPT <b>p</b> YLAPEVLVSVGTAGYNR | 1340.54 |         | 1804.19 | 1244.41 |
| EADPALNVETEIEILK (IS-1)                                                             | 595.3   |         | 1468.8  | 260.2   |
| VFVFFDLTVDDQSVYPK (IS-2)                                                            | 673.7   |         | 836.4   | 244.2   |

### MRM transition pair list for the Chk-2 activation loop region.

Two Q1 m/z (Q1a, Q1b) were selected that would ionize with multiple charge states. Those ions with only a single Q1 mass were either not observed to have higher charge states or the mass was out of the instrument mass range. Multiple diagnostic Q3 m/z (Q3a, Q3b) were selected for each peptide. Carbamidomethylcysteine was a fixed modification. A total of 110 MRM transition pairs were incorporated into the analysis.

## Supplemental Data

**Supplemental Figure 1. Example MS/MS Spectra used for Quantitation.** MS/MS spectra and annotated ion tables of the Chk-2 peptide K-ILGETSLMR-T illustrating the ability to distinguish adjacent phosphorylation sites by MRM. Panel A represents the fragmentation spectra for phosphorylation at T-378 indicated by the presence of the neutral loss ion at b5. Panel B shows the fragmentation spectra for the S-379 phosphorylation by the presence of the neutral loss ion at y4. Both peptides had oxidated Methionine as an additional modification indicated by (\*).

**Supplemental Figure 2. Example of Quantitative Change in the T389 Phosphopeptide.** A-B) Extracted ion overlay chromatograms (XIC) of two transition masses unique to the tryptic phosphopeptide R-TLCGTPpTYLAPEVLVSVG TAGYNR-I. C). The XIC of the 2 internal standards from nuclear lysate. Each trace is representative of the total, non-normalized area under the curve for each condition. Shown are the extrapolated peaks for before (-IR) and after (IR+) ionizing radiation.
